# Supplementary material
Source: bioRxiv or medRxiv preprint supplement (https://www.biorxiv.org/highwire/filestream/139099/field_highwire_adjunct_files/0/458836-1.pdf)
Supplement: Supplementary file [file 458836-1.pdf]

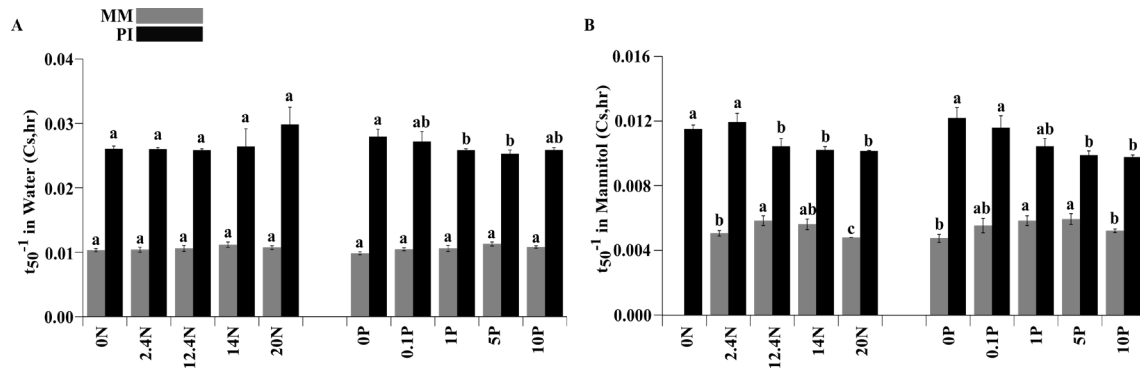

**Fig. S1.** Effects of maternal nutritional environments on seed germination traits of both **MM** and **PI**. **A**,  $t_{50}^{-1}$  in water; **B**,  $t_{50}^{-1}$  in Mannitol (-0.5 MPa) in different concentration of nitrate (0N, 2.4N, 12.4N, 14N and 20N) and phosphate (0P, 0.1P, 1P, 5P and 10P).
